# Supplementary material for: What Every Internist-Endocrinologist Should Know about Rare Genetic Syndromes in Order to Prevent Needless Diagnostics, Missed Diagnoses and Medical Complications: Five Years of ‘Internal Medicine for Rare Genetic Syndromes’
Source: MDPI journal article supplement (doi:10.3390/jcm10225457), 2021-11-22
Supplement: s1 [file s1]

## Supplementary data

**Title:** What every internist-endocrinologist should know about rare genetic syndromes in order to prevent needless diagnostics, missed diagnoses and medical complications: Five years of 'Internal Medicine for Rare Genetic Syndromes'

**Authors:** Anna G.W. Rosenberg, Minke R.A. Pater, Karlijn Pellikaan, Kirsten Davidse, Anja. A. Kattentidt-Mouravieva, Rogier Kersseboom, Anja G. Bos-Roubos, Agnies van Eeghen, José M.C. Veen, Jiske J. van der Meulen, Nina van Aalst-van Wieringen, Franciska M.E. Hoekstra, Aart J. van der Lely, Laura C.G. de Graaff

**Corresponding author:** Laura C.G. de Graaff, MD, PhD; Department of Internal Medicine-Endocrinology, Erasmus University Medical Center. Dr. Molewaterplein 40, 3015 GD Rotterdam, the Netherlands. E-mail: l.degraaff@erasmusmc.nl

**Table S1.** Clinical manifestations of complex rare genetic disorders seen in our center since 2015

|                                    | <b>Endocrine manifestations</b>                                                                                                                                                                                                                                                                                                                                                                                               | <b>Internal medicine – Other</b>                                                                                                                                                                                 | <b>Other disciplines</b>                                                                                                                                                                                                                                                                                                                                                       |
|------------------------------------|-------------------------------------------------------------------------------------------------------------------------------------------------------------------------------------------------------------------------------------------------------------------------------------------------------------------------------------------------------------------------------------------------------------------------------|------------------------------------------------------------------------------------------------------------------------------------------------------------------------------------------------------------------|--------------------------------------------------------------------------------------------------------------------------------------------------------------------------------------------------------------------------------------------------------------------------------------------------------------------------------------------------------------------------------|
| Albright hereditary osteodystrophy | <ul style="list-style-type: none"> <li>• Obesity (42)</li> <li>• Parathyroid hormone resistance (42)</li> <li>• Hypercalcitoninemia (42)</li> <li>• Thyroid-stimulating hormone resistance, unexplained congenital hypothyroidism (42)</li> <li>• Gonadotropin resistance (hypogonadism) (42)</li> <li>• Growth hormone deficiency (42)</li> <li>• Advanced skeletal maturation (42)</li> <li>• Short stature (42)</li> </ul> | <ul style="list-style-type: none"> <li>• Asthma (42)</li> <li>• Sleep apnea (42)</li> </ul>                                                                                                                      | <ul style="list-style-type: none"> <li>• Carpal tunnel syndrome (43)</li> <li>• Neurological problems, including impaired cognition and intellectual disability (42)</li> <li>• Acrodysostosis (42)</li> <li>• Ectopic ossifications (42)</li> <li>• Cataract (42)</li> <li>• Ear infections (42)</li> <li>• Oral complications (42)</li> <li>• Cryptorchidism (42)</li> </ul> |
| Allan-Herndon-Dudley syndrome      | <ul style="list-style-type: none"> <li>• Dysthyroidism (high free T3, normal to low-normal serum T4, upper-normal TSH) (44)</li> <li>• Short stature (44)</li> </ul>                                                                                                                                                                                                                                                          | <ul style="list-style-type: none"> <li>• Pneumopathies (45)</li> </ul>                                                                                                                                           | <ul style="list-style-type: none"> <li>• Hypotonia (44)</li> <li>• Spasticity (45)</li> <li>• Dystonia (45)</li> <li>• Hypomyelination (45)</li> <li>• Brain atrophy (45)</li> <li>• Muscular hypoplasia (44)</li> <li>• Intellectual disability (44)</li> <li>• Seizures (44)</li> <li>• Scoliosis (44)</li> <li>• Ocular abnormalities (44)</li> </ul>                       |
| Alström syndrome                   | <ul style="list-style-type: none"> <li>• Obesity (46)</li> <li>• Diabetes mellitus type II (46)</li> <li>• Growth hormone deficiency(47)</li> <li>• Hypogonadism (46)</li> <li>• Hypothyroidism (46)</li> <li>• Hyperthyroidism (46)</li> <li>• Advanced skeletal maturation (46)</li> </ul>                                                                                                                                  | <ul style="list-style-type: none"> <li>• Hepatic disease (46)</li> <li>• Renal dysfunction (46)</li> <li>• Cardiomyopathy (46)</li> <li>• Hypertriglyceridemia (46)</li> <li>• Pulmonary failure (47)</li> </ul> | <ul style="list-style-type: none"> <li>• Visual problems (46)</li> <li>• Hearing impairment (46)</li> <li>• Mild ataxia (46)</li> <li>• Hypotonia (46)</li> <li>• Poor balance (46)</li> <li>• Seizures (46)</li> <li>• Acanthosis nigricans (47)</li> <li>• Intellectual disability/developmental delay (47)</li> <li>• Scoliosis (47)</li> </ul>                             |

|                          |                                                                                                                                                                                                                                                                                                                                                                                                                                                 |                                                                                                                                                                                                                    |                                                                                                                                                                                                                                                                            |
|--------------------------|-------------------------------------------------------------------------------------------------------------------------------------------------------------------------------------------------------------------------------------------------------------------------------------------------------------------------------------------------------------------------------------------------------------------------------------------------|--------------------------------------------------------------------------------------------------------------------------------------------------------------------------------------------------------------------|----------------------------------------------------------------------------------------------------------------------------------------------------------------------------------------------------------------------------------------------------------------------------|
|                          |                                                                                                                                                                                                                                                                                                                                                                                                                                                 |                                                                                                                                                                                                                    | <ul style="list-style-type: none"> <li>• Alopecia (46)</li> </ul>                                                                                                                                                                                                          |
| Angelman syndrome        | <ul style="list-style-type: none"> <li>• Obesity (48)</li> <li>• Osteopenia/osteoporosis (48)</li> </ul>                                                                                                                                                                                                                                                                                                                                        | <ul style="list-style-type: none"> <li>• Gastroesophageal reflux (49)</li> <li>• Constipation (48)</li> <li>• Pneumonia (48)</li> </ul>                                                                            | <ul style="list-style-type: none"> <li>• Intellectual disability (48)</li> <li>• Epilepsy (48)</li> <li>• Sleep disturbances (48)</li> <li>• Behavioral problems (48)</li> <li>• Visual problems (48)</li> <li>• Scoliosis (48)</li> <li>• Seizures (48)</li> </ul>        |
| Axenfeld-Rieger syndrome |                                                                                                                                                                                                                                                                                                                                                                                                                                                 | <ul style="list-style-type: none"> <li>• Kidney abnormalities (50)</li> <li>• Heart defects (50)</li> </ul>                                                                                                        | <ul style="list-style-type: none"> <li>• Dental abnormalities (51)</li> <li>• Ocular abnormalities, including glaucoma (50)</li> <li>• Abnormal brain development (50)</li> <li>• Hearing loss (50)</li> </ul>                                                             |
| Bardet-Biedl syndrome    | <ul style="list-style-type: none"> <li>• Non insulin-dependent diabetes mellitus (52)</li> <li>• Nephrogenic diabetes mellitus (53)</li> <li>• Metabolic syndrome (53)</li> <li>• Hypogonadism (52)</li> <li>• Growth hormone deficiency (54)</li> <li>• Hyperprolactinemia (54)</li> <li>• Structural pituitary abnormalities (54)</li> <li>• Obesity (52)</li> <li>• Subclinical hypothyroidism (53)</li> <li>• Short stature (52)</li> </ul> | <ul style="list-style-type: none"> <li>• Hepatic fibrosis (52)</li> <li>• Hypertension (53)</li> <li>• Hypertriglyceridemia (53)</li> <li>• Hypercholesterolemia (52)</li> <li>• Renal dysfunction (52)</li> </ul> | <ul style="list-style-type: none"> <li>• Intellectual disability (52)</li> <li>• Ocular abnormalities (52)</li> <li>• Ataxia (55)</li> <li>• Spasticity (55)</li> <li>• Congenital heart defects (53,56)</li> <li>• Polydactyly and dystrophic extremities (52)</li> </ul> |
| Bloom syndrome           | <ul style="list-style-type: none"> <li>• Abnormal carbohydrate metabolism (57)</li> <li>• Dyslipidemia (57)</li> <li>• Hypothyroidism (57)</li> </ul>                                                                                                                                                                                                                                                                                           | <ul style="list-style-type: none"> <li>• Malignancies (57)</li> <li>• Diarrhea (57)</li> <li>• Gastroesophageal reflux (57)</li> </ul>                                                                             | <ul style="list-style-type: none"> <li>• Skin abnormalities (57)</li> <li>• Early motor and speech delays (57)</li> </ul>                                                                                                                                                  |

|                                    |                                                                                                                                                                                                                                                                                                            |                                                                                                                                                                                                                                                                                                        |                                                                                                                                                                                                                                                                                                                                                                                                                                                                                                      |
|------------------------------------|------------------------------------------------------------------------------------------------------------------------------------------------------------------------------------------------------------------------------------------------------------------------------------------------------------|--------------------------------------------------------------------------------------------------------------------------------------------------------------------------------------------------------------------------------------------------------------------------------------------------------|------------------------------------------------------------------------------------------------------------------------------------------------------------------------------------------------------------------------------------------------------------------------------------------------------------------------------------------------------------------------------------------------------------------------------------------------------------------------------------------------------|
|                                    | <ul style="list-style-type: none"> <li>• Diabetes mellitus type II (57)</li> <li>• Infertility/subfertility (57)</li> <li>• Short stature (57)</li> </ul>                                                                                                                                                  | <ul style="list-style-type: none"> <li>• Vomiting (57)</li> <li>• Immune abnormalities (57)</li> </ul>                                                                                                                                                                                                 |                                                                                                                                                                                                                                                                                                                                                                                                                                                                                                      |
| Börjeson-Forssman-Lehmann syndrome | <ul style="list-style-type: none"> <li>• Obesity (58)</li> <li>• Hypopituitarism (58)</li> <li>• Gynaecomastia (58)</li> <li>• Hypogonadism (59)</li> <li>• Short stature (58)</li> </ul>                                                                                                                  |                                                                                                                                                                                                                                                                                                        | <ul style="list-style-type: none"> <li>• Intellectual disability (58)</li> <li>• Feeding difficulties (58)</li> <li>• Hypotonia (58)</li> <li>• Polyneuropathy (59)</li> <li>• Epilepsy (58)</li> <li>• Perthes disease (58)</li> <li>• Hearing problems (58)</li> <li>• Scoliosis (58)</li> </ul>                                                                                                                                                                                                   |
| CAMK2A variants                    | <ul style="list-style-type: none"> <li>• Overgrowth (60)</li> <li>• Growth delay (61)</li> </ul>                                                                                                                                                                                                           | <ul style="list-style-type: none"> <li>• Cardiac abnormalities (60)</li> <li>• Gastrointestinal problems (60)</li> </ul>                                                                                                                                                                               | <ul style="list-style-type: none"> <li>• Intellectual disability (60)</li> <li>• Behavioral problems (60)</li> <li>• Hypotonia (61)</li> <li>• Seizures/convulsions (61)</li> <li>• Visual problems (61)</li> <li>• Cryptorchidism (60)</li> </ul>                                                                                                                                                                                                                                                   |
| CHARGE syndrome                    | <ul style="list-style-type: none"> <li>• Growth hormone deficiency (62)</li> <li>• Hypogonadotropic hypogonadism (62,63)</li> <li>• Thyroid-stimulating hormone deficiency (62)</li> <li>• ACTH deficiency (62)</li> <li>• Structural pituitary abnormalities (62)</li> <li>• Osteoporosis (64)</li> </ul> | <ul style="list-style-type: none"> <li>• Gastrointestinal problems, including constipation, vomiting, difficulty swallowing and gastroesophageal reflux (65,66)</li> <li>• Cardiovascular malformations (67,68)</li> <li>• Obstructive sleep apnea (69)</li> <li>• Renal abnormalities (68)</li> </ul> | <ul style="list-style-type: none"> <li>• Intellectual disability (67)</li> <li>• Cranial nerve abnormalities (70)</li> <li>• Brain abnormalities (68)</li> <li>• Seizures (71)</li> <li>• Autism spectrum disorder (68)</li> <li>• Ocular abnormalities (71)</li> <li>• Ear abnormalities, including hearing loss (68,72)</li> <li>• Cleft palate (68)</li> <li>• Genital/urinary tract abnormalities (68,73)</li> <li>• Feeding difficulties (65)</li> <li>• Skeletal abnormalities (68)</li> </ul> |
| CHD8 syndrome                      | <ul style="list-style-type: none"> <li>• Overgrowth (74)</li> </ul>                                                                                                                                                                                                                                        | <ul style="list-style-type: none"> <li>• Constipation (75)</li> </ul>                                                                                                                                                                                                                                  | <ul style="list-style-type: none"> <li>• Intellectual disability (74)</li> <li>• Autism spectrum disorder/autism traits (74)</li> <li>• Hypotonia (74,76)</li> <li>• Seizures (74)</li> <li>• Scoliosis (74)</li> </ul>                                                                                                                                                                                                                                                                              |

|                                       |                                                                                                                                                 |                                                                                                                      |                                                                                                                                                                                                                                                                                                                                                                                                                                                                                                                   |
|---------------------------------------|-------------------------------------------------------------------------------------------------------------------------------------------------|----------------------------------------------------------------------------------------------------------------------|-------------------------------------------------------------------------------------------------------------------------------------------------------------------------------------------------------------------------------------------------------------------------------------------------------------------------------------------------------------------------------------------------------------------------------------------------------------------------------------------------------------------|
|                                       |                                                                                                                                                 |                                                                                                                      | <ul style="list-style-type: none"> <li>• Clinodactyly (74)</li> <li>• Umbilical hernia (74)</li> <li>• Glabellar hemangioma (74)</li> <li>• Motor delay (76)</li> <li>• Macrocephaly (75)</li> <li>• Sleep disorder (76)</li> </ul>                                                                                                                                                                                                                                                                               |
| Chromosome 1q21 deletion syndrome     | <ul style="list-style-type: none"> <li>• Hypothyroidism (77)</li> <li>• Short stature (77)</li> </ul>                                           | <ul style="list-style-type: none"> <li>• Gastric ulcers (77)</li> <li>• Cardiac abnormalities (77,78)</li> </ul>     | <ul style="list-style-type: none"> <li>• Intellectual disability (77,78)</li> <li>• Impaired motor function (77)</li> <li>• ADHD (77)</li> <li>• Cataracts (78)</li> <li>• Joint laxity (78)</li> <li>• Hypotonia (78)</li> <li>• Epilepsy/seizures (78)</li> <li>• Scoliosis (77)</li> <li>• Autism spectrum disorder (77)</li> <li>• Microcephaly (77)</li> <li>• Tremor (77)</li> <li>• Sensorineural deafness (79)</li> <li>• Genitourinary abnormalities (79)</li> <li>• Brain malformations (79)</li> </ul> |
| Chromosome 1q25-32 deletion           | <ul style="list-style-type: none"> <li>• Hypothyroidism (80)</li> <li>• Growth hormone deficiency (80)</li> <li>• Short stature (80)</li> </ul> |                                                                                                                      | <ul style="list-style-type: none"> <li>• Intellectual disability (80,81)</li> <li>• Microcephaly (80)</li> <li>• Genital abnormalities (80)</li> </ul>                                                                                                                                                                                                                                                                                                                                                            |
| Chromosome 16p11.2 deletion syndrome  | <ul style="list-style-type: none"> <li>• Obesity (82,83)</li> <li>• Hyperinsulinemic hypoglycaemia (82)</li> </ul>                              | <ul style="list-style-type: none"> <li>• Possibly increased risk of severe combined immunodeficiency (84)</li> </ul> | <ul style="list-style-type: none"> <li>• Intellectual disability (83)</li> <li>• Motor/developmental delay (83)</li> <li>• Language disorder (82)</li> <li>• Autism spectrum disorder (82,83)</li> <li>• Psychological problems (83)</li> <li>• Epilepsy/seizures (82,83)</li> <li>• Structural abnormalities of the central nervous system (82)</li> <li>• ADHD (83)</li> </ul>                                                                                                                                  |
| Chromosome 16p13.11 deletion syndrome |                                                                                                                                                 | <ul style="list-style-type: none"> <li>• Constipation (85)</li> </ul>                                                | <ul style="list-style-type: none"> <li>• Developmental delay (86)</li> <li>• Motor delay (86)</li> <li>• Abnormal behavior (86)</li> <li>• Hypotonia (86)</li> </ul>                                                                                                                                                                                                                                                                                                                                              |

|                                |                                                                                                                                                                                                                                                         |                                                                                                                                                                                                                                                                                                                                                                                               |                                                                                                                                                                                                                                                                                                                                                                                                                                                                                                                                                                          |
|--------------------------------|---------------------------------------------------------------------------------------------------------------------------------------------------------------------------------------------------------------------------------------------------------|-----------------------------------------------------------------------------------------------------------------------------------------------------------------------------------------------------------------------------------------------------------------------------------------------------------------------------------------------------------------------------------------------|--------------------------------------------------------------------------------------------------------------------------------------------------------------------------------------------------------------------------------------------------------------------------------------------------------------------------------------------------------------------------------------------------------------------------------------------------------------------------------------------------------------------------------------------------------------------------|
|                                |                                                                                                                                                                                                                                                         |                                                                                                                                                                                                                                                                                                                                                                                               | <ul style="list-style-type: none"> <li>• Hearing loss (86)</li> <li>• Microcephaly (86)</li> <li>• Epilepsy (87)</li> <li>• Schizophrenia (85)</li> </ul>                                                                                                                                                                                                                                                                                                                                                                                                                |
| Cockayne syndrome              | <ul style="list-style-type: none"> <li>• Hypogonadism (88)</li> <li>• Abnormal glucose metabolism (89)</li> <li>• Growth failure (89)</li> <li>• Hypothyroidism (89)</li> </ul>                                                                         | <ul style="list-style-type: none"> <li>• Hypertension (89)</li> <li>• Dilated cardiomyopathy (90)</li> <li>• Aortic dilatation (91)</li> <li>• Gastroesophageal reflux (89)</li> <li>• Hepatic dysfunction (89)</li> <li>• Splenomegaly (92)</li> <li>• Renal problems (89)</li> <li>• Respiratory infections (89)</li> <li>• Restrictive lung disease (89)</li> <li>• Asthma (89)</li> </ul> | <ul style="list-style-type: none"> <li>• Intellectual disability (92)</li> <li>• Motor problems (88)</li> <li>• Microcephaly (89)</li> <li>• Ataxia (88)</li> <li>• Intracranial calcification (88)</li> <li>• Dermatologic abnormalities (89)</li> <li>• Sensorineural deafness (89)</li> <li>• Seizures (89)</li> <li>• Tremor (89)</li> <li>• Feeding difficulties (89)</li> <li>• Poor peripheral circulation (89)</li> <li>• Visual problems (90)</li> <li>• Scoliosis (92)</li> <li>• Muscle atrophy (92)</li> <li>• Decreased production of sweat (88)</li> </ul> |
| Congenital adrenal hyperplasia | <ul style="list-style-type: none"> <li>• Inadequate aldosterone production (93)</li> <li>• Impaired cortisol synthesis (93)</li> <li>• Insulin resistance (94)</li> <li>• Diabetes mellitus type II (94)</li> <li>• Decreased fertility (93)</li> </ul> | <ul style="list-style-type: none"> <li>• Salt wasting (93)</li> <li>• Failure to thrive (93)</li> <li>• Hypovolemia/shock (93)</li> <li>• Hypertension (94)</li> <li>• Increased carotid intima thickness (94)</li> <li>• Hyperlipidemia (94)</li> </ul>                                                                                                                                      | <ul style="list-style-type: none"> <li>• Abnormal development of external genitalia (93)</li> <li>• Psychosocial problems (93)</li> </ul>                                                                                                                                                                                                                                                                                                                                                                                                                                |
| Cornelia de Lange syndrome     | <ul style="list-style-type: none"> <li>• Hypogonadism (95)</li> <li>• Growth failure (95)</li> <li>• Obesity (96)</li> </ul>                                                                                                                            | <ul style="list-style-type: none"> <li>• Gastroesophageal reflux (96)</li> <li>• Constipation (96)</li> <li>• Renal dysfunction (95)</li> <li>• Aspiration (95)</li> <li>• Congenital heart defects (95)</li> <li>• Antibody deficiency (95)</li> </ul>                                                                                                                                       | <ul style="list-style-type: none"> <li>• Intellectual disability (95)</li> <li>• Epilepsy / seizures (95,96)</li> <li>• Temperature intolerance (95)</li> <li>• Decreased pain sensation (95)</li> <li>• Behavioral problems (self-destructive) (95)</li> <li>• Autistic-like behavior (95)</li> <li>• Sleep disturbances (97)</li> <li>• Hearing problems (98)</li> <li>• Cleft palate (95)</li> </ul>                                                                                                                                                                  |

|                                   |                                                                                                                                                                                                                                                                                              |                                                                                                                                                                                                                                                                              |                                                                                                                                                                                                                                                                                                                                                                                                                                                                 |
|-----------------------------------|----------------------------------------------------------------------------------------------------------------------------------------------------------------------------------------------------------------------------------------------------------------------------------------------|------------------------------------------------------------------------------------------------------------------------------------------------------------------------------------------------------------------------------------------------------------------------------|-----------------------------------------------------------------------------------------------------------------------------------------------------------------------------------------------------------------------------------------------------------------------------------------------------------------------------------------------------------------------------------------------------------------------------------------------------------------|
|                                   |                                                                                                                                                                                                                                                                                              |                                                                                                                                                                                                                                                                              | <ul style="list-style-type: none"> <li>• Urinary tract abnormalities (96)</li> <li>• Dental problems (95)</li> <li>• Hypertrichosis (95)</li> <li>• Limb abnormalities (95)</li> <li>• Visual problems (95)</li> <li>• Abnormalities of the external genitalia (95)</li> <li>• Feeding problems (99)</li> </ul>                                                                                                                                                 |
| Costello (like) syndrome          | <ul style="list-style-type: none"> <li>• Growth hormone deficiency (100)</li> <li>• Hypothyroidism (100)</li> <li>• Delayed or dysregulated puberty (100)</li> <li>• Hyperprolactinemia (101)</li> <li>• Parathyroid adenoma (101)</li> <li>• Hyperinsulinemic hypoglycemia (100)</li> </ul> | <ul style="list-style-type: none"> <li>• Increased risk of malignancy (100)</li> <li>• Cardiac problems (100)</li> <li>• Obstructive sleep apnea</li> <li>• Respiratory problems (100)</li> <li>• Pyloric stenosis (100)</li> <li>• Gastroesophageal reflux (100)</li> </ul> | <ul style="list-style-type: none"> <li>• Intellectual disability (100)</li> <li>• Hypotonia (100)</li> <li>• Neurologic abnormalities (100)</li> <li>• Failure to thrive (100)</li> <li>• Epilepsy (102)</li> <li>• Behavioral/social problems (100)</li> <li>• Dermatologic abnormalities (100)</li> <li>• Musculoskeletal abnormalities (100)</li> <li>• Dental abnormalities (100)</li> <li>• Visual problems (100)</li> </ul>                               |
| Cri-du-Chat syndrome              |                                                                                                                                                                                                                                                                                              | <ul style="list-style-type: none"> <li>• Cardiac abnormalities (103)</li> <li>• Renal abnormalities (103)</li> </ul>                                                                                                                                                         | <ul style="list-style-type: none"> <li>• Severe psychomotor retardation, including intellectual disability (104)</li> <li>• Microcephaly (104)</li> <li>• Renal abnormalities (103)</li> <li>• Behavioral problems (self-injurious behavior) (105)</li> <li>• Autism spectrum disorder (106)</li> <li>• Scoliosis (105)</li> <li>• Hypotonia (103)</li> <li>• Myopia and cataract (103)</li> <li>• Cryptorchidism (103)</li> <li>• Hypospadias (103)</li> </ul> |
| CTNNB1 syndrome (NEDSDV syndrome) |                                                                                                                                                                                                                                                                                              | <ul style="list-style-type: none"> <li>• Vomiting and constipation (107)</li> <li>• Respiratory infections (107)</li> </ul>                                                                                                                                                  | <ul style="list-style-type: none"> <li>• Intellectual disability (108)</li> <li>• Behavioral problems (aggression, automutilation, fecal smearing) (108)</li> <li>• Autistic-like behavior (109)</li> <li>• Microcephaly (109)</li> <li>• Motor delay (109)</li> </ul>                                                                                                                                                                                          |

|                                           |                                                                                                                                                                                                                                                     |                                                                                                                                                                                                                                                                                                                                                            |                                                                                                                                                                                                                                                                                                                                                                                                                                                                                                                                |
|-------------------------------------------|-----------------------------------------------------------------------------------------------------------------------------------------------------------------------------------------------------------------------------------------------------|------------------------------------------------------------------------------------------------------------------------------------------------------------------------------------------------------------------------------------------------------------------------------------------------------------------------------------------------------------|--------------------------------------------------------------------------------------------------------------------------------------------------------------------------------------------------------------------------------------------------------------------------------------------------------------------------------------------------------------------------------------------------------------------------------------------------------------------------------------------------------------------------------|
|                                           |                                                                                                                                                                                                                                                     |                                                                                                                                                                                                                                                                                                                                                            | <ul style="list-style-type: none"> <li>• Visual problems (109)</li> <li>• Distal spasticity/hypertonia (107)</li> <li>• Truncal hypotonia (107)</li> <li>• ADHD (107)</li> <li>• Scoliosis (107)</li> <li>• Hip dysplasia (107)</li> </ul>                                                                                                                                                                                                                                                                                     |
| Dandy-Walker syndrome                     | <ul style="list-style-type: none"> <li>• Growth retardation (110)</li> <li>• Fetal growth restriction (111)</li> </ul>                                                                                                                              | <ul style="list-style-type: none"> <li>• Congenital heart disease (111)</li> <li>• Polycystic kidneys (111)</li> </ul>                                                                                                                                                                                                                                     | <ul style="list-style-type: none"> <li>• Congenital intracranial malformation compromising a spectrum of brain abnormalities (110)</li> <li>• Psychomotor retardation, including intellectual disability (110)</li> <li>• Hypotonia (110)</li> <li>• Scoliosis (110)</li> <li>• Visual problems (110)</li> <li>• Facial clefts (111)</li> <li>• Limb and abdominal wall abnormalities (111)</li> <li>• Diaphragmatic hernia (111)</li> <li>• Ambiguous genitalia (111)</li> </ul>                                              |
| DiGeorge syndrome (22q11.2 deletion)      | <ul style="list-style-type: none"> <li>• Hypocalcemia (112,113)</li> <li>• Hypoparathyroidism (114)</li> <li>• Hypothyroidism (115)</li> <li>• Hyperthyroidism (115)</li> <li>• Growth hormone deficiency (116)</li> <li>• Obesity (115)</li> </ul> | <ul style="list-style-type: none"> <li>• Gastroesophageal reflux (117)</li> <li>• Constipation (117)</li> <li>• Vomiting (117)</li> <li>• Thrombocytopenia (115)</li> <li>• Thymic hypoplasia (115)</li> <li>• Recurrent infections (e.g. pneumonia, otitis media) (115)</li> <li>• Rhabdoid tumor (118)</li> <li>• Cardiac abnormalities (115)</li> </ul> | <ul style="list-style-type: none"> <li>• Intellectual disability (119)</li> <li>• Hemiparesis (115)</li> <li>• Hypotonia (120)</li> <li>• Camptodactyly (121)</li> <li>• Seizures (122)</li> <li>• ADHD (123)</li> <li>• Autistic spectrum disorder (124)</li> <li>• Neuropsychiatric manifestations (124,125)</li> <li>• Sleep disturbances (126)</li> <li>• Visual problems (115)</li> <li>• Hearing problems (115)</li> <li>• Scoliosis (115)</li> <li>• Cleft palate (127)</li> <li>• Urogenital problems (115)</li> </ul> |
| Disorders of Sex Development <sup>a</sup> | <ul style="list-style-type: none"> <li>• Subfertility/infertility (128)</li> <li>• Cortisol deficiency (128)</li> </ul>                                                                                                                             | <ul style="list-style-type: none"> <li>• Electrolyte disorders (128)</li> <li>• Hypotension (128)</li> </ul>                                                                                                                                                                                                                                               | <ul style="list-style-type: none"> <li>• Ambiguous genitalia (128)</li> </ul>                                                                                                                                                                                                                                                                                                                                                                                                                                                  |



|                                                                 |                                                                                                                                                                                                                                                                                                      |                                                                                                                                                                                                                                                                                      |                                                                                                                                                                                                                                                                                                                                   |
|-----------------------------------------------------------------|------------------------------------------------------------------------------------------------------------------------------------------------------------------------------------------------------------------------------------------------------------------------------------------------------|--------------------------------------------------------------------------------------------------------------------------------------------------------------------------------------------------------------------------------------------------------------------------------------|-----------------------------------------------------------------------------------------------------------------------------------------------------------------------------------------------------------------------------------------------------------------------------------------------------------------------------------|
|                                                                 | <ul style="list-style-type: none"> <li>• Disturbed androgen synthesis (128)</li> <li>• Failure to thrive (128)</li> </ul>                                                                                                                                                                            | <ul style="list-style-type: none"> <li>• Renal, adrenal, and lung dysgenesis (only for loss-of-function mutations in WNT4) (129)</li> <li>• Congenital heart disease (especially for loss-of-function mutations in GATA4) (128)</li> </ul>                                           | <ul style="list-style-type: none"> <li>• Campomelic dysplasia (only for loss-of-function mutations in SOX9) (128)</li> <li>• Psychosocial problems (130)</li> </ul>                                                                                                                                                               |
| Down syndrome (trisomy 21)                                      | <ul style="list-style-type: none"> <li>• Hypogonadism (131)</li> <li>• (Subclinical) hypothyroidism (132)</li> <li>• Increased risk of type I diabetes (132)</li> <li>• Osteopenia (133)</li> <li>• Osteoporosis (133)</li> <li>• Overweight/obesity (133)</li> <li>• Short stature (132)</li> </ul> | <ul style="list-style-type: none"> <li>• Overall risk for autoimmune diseases (132)</li> <li>• Sleep apnea (133)</li> <li>• Congenital heart disease (134)</li> <li>• Gastrointestinal problems (133)</li> </ul>                                                                     | <ul style="list-style-type: none"> <li>• Intellectual disability (135)</li> <li>• Hearing impairment (133)</li> <li>• Attentional impairment (136)</li> <li>• Early onset of Alzheimer disease (135)</li> <li>• Visual problems (133)</li> <li>• Behavioral and psychological problems (133)</li> <li>• Seizures (133)</li> </ul> |
| Hypogonadotropic hypogonadism with anosmia (Kallmann syndrome)  | <ul style="list-style-type: none"> <li>• Hypogonadotropic hypogonadism (137)</li> <li>• Advanced skeletal maturation (137)</li> <li>• Obesity (138)</li> <li>• Short stature (137)</li> </ul>                                                                                                        | <ul style="list-style-type: none"> <li>• Renal agenesis (137)</li> </ul>                                                                                                                                                                                                             | <ul style="list-style-type: none"> <li>• Hyposmia/anosmia (139)</li> <li>• Cleft palate (137)</li> <li>• Hearing impairment (137)</li> <li>• Visual problems (138)</li> <li>• Psychological problems (137)</li> <li>• Low muscle mass (137)</li> <li>• Agenesis of corpus callosum (138)</li> </ul>                               |
| Hypogonadotropic hypogonadism without anosmia (Kiss1R mutation) | <ul style="list-style-type: none"> <li>• Hypogonadotropic hypogonadism (140)</li> <li>• Growth hormone deficiency (141)</li> <li>• Impaired cortisol secretion (141)</li> </ul>                                                                                                                      |                                                                                                                                                                                                                                                                                      |                                                                                                                                                                                                                                                                                                                                   |
| Jacobsen syndrome (11q terminal deletion syndrome)              | <ul style="list-style-type: none"> <li>• Growth hormone deficiency (142)</li> <li>• Hypothyroidism (142)</li> <li>• Growth retardation (143)</li> </ul>                                                                                                                                              | <ul style="list-style-type: none"> <li>• Constipation (143)</li> <li>• Abnormal platelet function, thrombocytopenia or pancytopenia (143)</li> <li>• Deficit of cellular or humoral immunity with low IgM and IgA (144,145)</li> <li>• Increased risk of malignancy (143)</li> </ul> | <ul style="list-style-type: none"> <li>• Intellectual disability (143)</li> <li>• Behavioral problems (143)</li> <li>• Genital, central nervous system and skeletal malformations (143)</li> </ul>                                                                                                                                |

|                  |                                                                                                                                                                                                                                                                                              |                                                                                                                                                                                                                                                                                                                             |                                                                                                                                                                                                                                                                                                                                                                                                                                      |
|------------------|----------------------------------------------------------------------------------------------------------------------------------------------------------------------------------------------------------------------------------------------------------------------------------------------|-----------------------------------------------------------------------------------------------------------------------------------------------------------------------------------------------------------------------------------------------------------------------------------------------------------------------------|--------------------------------------------------------------------------------------------------------------------------------------------------------------------------------------------------------------------------------------------------------------------------------------------------------------------------------------------------------------------------------------------------------------------------------------|
|                  |                                                                                                                                                                                                                                                                                              | <ul style="list-style-type: none"> <li>• Cardiovascular, renal, and gastrointestinal tract malformations (143)</li> </ul>                                                                                                                                                                                                   |                                                                                                                                                                                                                                                                                                                                                                                                                                      |
| Joubert syndrome | <ul style="list-style-type: none"> <li>• Central diabetes insipidus (146)</li> <li>• Diabetes mellitus type 1 (146)</li> <li>• Pubertas praecox (146)</li> <li>• Hypothyroidism (146)</li> <li>• Growth hormone deficiency (146)</li> <li>• Panhypopituitarism (146)</li> </ul>              | <ul style="list-style-type: none"> <li>• Hypertension (147)</li> <li>• Kidney disease (147)</li> <li>• Alternating tachypnea and/or apnea (148)</li> <li>• Elevated transaminases and gamma-glutamyl transferase (146)</li> <li>• Gastrointestinal complications (146)</li> <li>• Congenital heart disease (146)</li> </ul> | <ul style="list-style-type: none"> <li>• Intellectual disability (148)</li> <li>• Hypotonia (148)</li> <li>• Brain abnormalities (146)</li> <li>• Ataxia (146)</li> <li>• Visual problems (146)</li> <li>• Scoliosis (146)</li> </ul>                                                                                                                                                                                                |
| JS-X syndrome    |                                                                                                                                                                                                                                                                                              |                                                                                                                                                                                                                                                                                                                             | <ul style="list-style-type: none"> <li>• Conductive and sensorineural hearing loss (149)</li> <li>• Underdeveloped shoulder musculature (149)</li> <li>• Outer and middle ear deformity (149)</li> <li>• Laryngeal obstruction (149)</li> </ul>                                                                                                                                                                                      |
| Kabuki syndrome  | <ul style="list-style-type: none"> <li>• Growth hormone deficiency (150)</li> <li>• Obesity (151)</li> <li>• Hypothyroidism (151)</li> <li>• Hypoglycemia (150)</li> <li>• Delayed sexual development (150)</li> <li>• Pubertas praecox (150)</li> <li>• Diabetes insipidus (150)</li> </ul> | <ul style="list-style-type: none"> <li>• Gastroesophageal reflux (152)</li> <li>• Immune dysfunction (150)</li> <li>• Congenital heart defects (150)</li> <li>• Gastrointestinal malformations (150)</li> <li>• Renal abnormalities (150)</li> <li>• Malignancies (150)</li> </ul>                                          | <ul style="list-style-type: none"> <li>• Intellectual disability (150)</li> <li>• Autism-spectrum disorder (150)</li> <li>• Ocular abnormalities (152)</li> <li>• Hearing deficit (150)</li> <li>• Joint hypermobility (153)</li> <li>• Hypotonia (150)</li> <li>• Seizures (150)</li> <li>• Scoliosis (154)</li> <li>• Genitourinary abnormalities (150)</li> <li>• Feeding problems (150)</li> <li>• Microcephaly (150)</li> </ul> |

|                      |                                                                                                                                                                                                                                                                                                                                              |                                                                                                                                                                                                |                                                                                                                                                                                                                                                                                                                                                   |
|----------------------|----------------------------------------------------------------------------------------------------------------------------------------------------------------------------------------------------------------------------------------------------------------------------------------------------------------------------------------------|------------------------------------------------------------------------------------------------------------------------------------------------------------------------------------------------|---------------------------------------------------------------------------------------------------------------------------------------------------------------------------------------------------------------------------------------------------------------------------------------------------------------------------------------------------|
| KAT6A syndrome       |                                                                                                                                                                                                                                                                                                                                              | <ul style="list-style-type: none"> <li>• Cardiac abnormalities (155)</li> <li>• Gastrointestinal complications, including reflux and constipation (155)</li> <li>• Infections (155)</li> </ul> | <ul style="list-style-type: none"> <li>• Intellectual disability (155)</li> <li>• Developmental delay (155)</li> <li>• Microcephaly (155)</li> <li>• Visual problems (155)</li> <li>• Behavioral problems (155)</li> <li>• Sleep problems (155)</li> <li>• Hypotonia (156)</li> <li>• Cryptorchidism (156)</li> <li>• Syndactyly (156)</li> </ul> |
| Klinefelter syndrome | <ul style="list-style-type: none"> <li>• Diabetes mellitus type II (157)</li> <li>• Obesity (158)</li> <li>• Hypogonadism (159)</li> <li>• Osteoporosis (159)</li> <li>• Gynaecomastia (160)</li> <li>• Insulin resistance (157)</li> <li>• Metabolic syndrome (157)</li> <li>• Dyslipidemia (161)</li> <li>• Short stature (160)</li> </ul> | <ul style="list-style-type: none"> <li>• Liver adenoma (162)</li> <li>• Increased risk of male breast cancer (163)</li> <li>• Cardiovascular problems (161)</li> </ul>                         | <ul style="list-style-type: none"> <li>• Genital abnormalities (160)</li> <li>• Neurocognitive disorders (160)</li> <li>• Psychosocial problems (160)</li> </ul>                                                                                                                                                                                  |
| L1CAM mutation       | <ul style="list-style-type: none"> <li>• Growth hormone deficiency (164)</li> </ul>                                                                                                                                                                                                                                                          | <ul style="list-style-type: none"> <li>• Hirschsprung disease (165)</li> <li>• Dysphagia (164)</li> <li>• Constipation (164)</li> <li>• Cardiac malformations (164,166)</li> </ul>             | <ul style="list-style-type: none"> <li>• Hydrocephalus (165)</li> <li>• Intellectual disability (165)</li> <li>• Motor delay (166)</li> <li>• Spasticity of the legs (165)</li> <li>• Corpus callosum hypogenesis/agenesis (165)</li> <li>• Arthrogryposis (164)</li> <li>• Scoliosis (164)</li> </ul>                                            |
| Myhre syndrome       | <ul style="list-style-type: none"> <li>• Abnormal onset of puberty (167)</li> <li>• Advanced skeletal maturation (167)</li> <li>• Short stature (168)</li> </ul>                                                                                                                                                                             | <ul style="list-style-type: none"> <li>• Hypertension (167)</li> </ul>                                                                                                                         | <ul style="list-style-type: none"> <li>• Intellectual disability (168)</li> <li>• Behavioral problems (169)</li> <li>• Deafness (169)</li> <li>• Restrictive joint movement (168)</li> <li>• Thick calvarium (168)</li> </ul>                                                                                                                     |

|                               |                                                                                                                                                                                                                                                                                                                                                                                                                                                                                                                                                                                             |                                                                                                                                                                                       |                                                                                                                                                                                                                                                                                                                                                                                                                                                                                         |
|-------------------------------|---------------------------------------------------------------------------------------------------------------------------------------------------------------------------------------------------------------------------------------------------------------------------------------------------------------------------------------------------------------------------------------------------------------------------------------------------------------------------------------------------------------------------------------------------------------------------------------------|---------------------------------------------------------------------------------------------------------------------------------------------------------------------------------------|-----------------------------------------------------------------------------------------------------------------------------------------------------------------------------------------------------------------------------------------------------------------------------------------------------------------------------------------------------------------------------------------------------------------------------------------------------------------------------------------|
| Neurofibromatosis type 1      | <ul style="list-style-type: none"> <li>• Increased risk of pheochromocytoma (170)</li> <li>• Growth hormone deficiency (170)</li> <li>• Osteopenia/osteoporosis (170)</li> <li>• Central precocious puberty<sup>b</sup> (171)</li> <li>• Obesity<sup>b</sup> (171)</li> <li>• Impaired glucose intolerance<sup>b</sup> (171)</li> <li>• Growth hormone excess<sup>b</sup> (171)</li> <li>• ACTH deficiency<sup>b</sup> (171)</li> <li>• Hypogonadotropic hypogonadism<sup>b</sup> (171)</li> <li>• Thyrotropin deficiency<sup>b</sup> (171)</li> <li>• Hyperparathyroidism (172)</li> </ul> | <ul style="list-style-type: none"> <li>• Hypertension (173)</li> <li>• Hypovitaminosis D (174)</li> <li>• Increased risk of malignancy (170)</li> <li>• Vasculopathy (170)</li> </ul> | <ul style="list-style-type: none"> <li>• Visual problems (175)</li> <li>• ADHD (176)</li> <li>• Autistic-like behavior (170)</li> <li>• Behavioral and learning problems (170)</li> <li>• Psychosocial problems (170,177)</li> <li>• Depression (177)</li> <li>• Plexiform neurofibromas (170)</li> <li>• Sleep disturbances (178)</li> <li>• Increased risk of stroke (179)</li> <li>• Scoliosis (170)</li> <li>• Dermatologic problems (170)</li> <li>• Brain tumors (170)</li> </ul> |
| Noonan syndrome               | <ul style="list-style-type: none"> <li>• Male gonadal dysfunction (180)</li> <li>• Hypothyroidism (180)</li> <li>• Short stature (180)</li> </ul>                                                                                                                                                                                                                                                                                                                                                                                                                                           | <ul style="list-style-type: none"> <li>• Thrombocytopenia (181)</li> <li>• Leukemia (182)</li> <li>• Congenital heart defects (180)</li> <li>• Renal abnormalities (180)</li> </ul>   | <ul style="list-style-type: none"> <li>• Intellectual disability (180)</li> <li>• ADHD (181)</li> <li>• Ocular abnormalities (181)</li> <li>• Hearing loss (181)</li> <li>• Pectus excavatum or carinatum (181)</li> <li>• Scoliosis (181)</li> <li>• Feeding difficulties (181)</li> <li>• Urinary tract abnormalities (182)</li> <li>• Lymphedema (181)</li> <li>• Dental problems (181)</li> <li>• Genital abnormalities (181)</li> </ul>                                            |
| PNPLA6 gene mutation          | <ul style="list-style-type: none"> <li>• Anterior hypopituitarism (growth hormone, thyroid hormone, or gonadotropin deficiencies) (183)</li> <li>• Short stature (183)</li> </ul>                                                                                                                                                                                                                                                                                                                                                                                                           |                                                                                                                                                                                       | <ul style="list-style-type: none"> <li>• Cerebellar ataxia (183)</li> <li>• Spasticity (183)</li> <li>• Visual problems (183)</li> <li>• Peripheral neuropathy (183)</li> <li>• Hair abnormalities (183)</li> <li>• Impaired cognitive functioning (183)</li> </ul>                                                                                                                                                                                                                     |
| PTEN hamartoma tumor syndrome | <ul style="list-style-type: none"> <li>• Goiter of thyroid (184)</li> <li>• Obesity (185)</li> <li>• Increased insulin sensitivity (185)</li> </ul>                                                                                                                                                                                                                                                                                                                                                                                                                                         | <ul style="list-style-type: none"> <li>• Hamartomatous tumors (184)</li> <li>• Increased risk of malignancies (184)</li> <li>• Vascular malformations (186)</li> </ul>                | <ul style="list-style-type: none"> <li>• Macrocephaly (184)</li> <li>• Developmental delay, including intellectual disability (184)</li> <li>• Myopathy (184)</li> <li>• Joint hyperextensibility (184)</li> <li>• Pectus excavatum (184)</li> </ul>                                                                                                                                                                                                                                    |

|                              |                                                                                                                                                                                                                                                                                                                                                                                     |                                                                                                                                                                                                                                                  |                                                                                                                                                                                                                                                                                                                                                                                                                                                                                                                                                                           |
|------------------------------|-------------------------------------------------------------------------------------------------------------------------------------------------------------------------------------------------------------------------------------------------------------------------------------------------------------------------------------------------------------------------------------|--------------------------------------------------------------------------------------------------------------------------------------------------------------------------------------------------------------------------------------------------|---------------------------------------------------------------------------------------------------------------------------------------------------------------------------------------------------------------------------------------------------------------------------------------------------------------------------------------------------------------------------------------------------------------------------------------------------------------------------------------------------------------------------------------------------------------------------|
|                              |                                                                                                                                                                                                                                                                                                                                                                                     |                                                                                                                                                                                                                                                  | <ul style="list-style-type: none"> <li>• Scoliosis (184)</li> <li>• Autism spectrum disorder (184)</li> <li>• Genitourinary malformations (186)</li> <li>• Dermatologic problems (186)</li> </ul>                                                                                                                                                                                                                                                                                                                                                                         |
| Prader-Willi (like) syndrome | <ul style="list-style-type: none"> <li>• Obesity (187)</li> <li>• Growth hormone deficiency (187)</li> <li>• Hypogonadism (18,187)</li> <li>• Hypothyroidism (18,188)</li> <li>• Diabetes mellitus type II (18,187)</li> <li>• Central adrenal insufficiency (22)</li> <li>• Hypothalamic dysfunction (187)</li> <li>• Osteoporosis (187)</li> <li>• Short stature (187)</li> </ul> | <ul style="list-style-type: none"> <li>• Hypercholesterolemia (18,189)</li> <li>• Hypertension (18)</li> <li>• Hypovitaminosis D (18,190)</li> <li>• Peripheral edema (191)</li> <li>• Constipation (192)</li> <li>• Sleep apnea (18)</li> </ul> | <ul style="list-style-type: none"> <li>• Intellectual disability (187)</li> <li>• Sleep disturbances (187)</li> <li>• Behavioral problems and self-injurious behavior (193)</li> <li>• High pain threshold (187)</li> <li>• Inability to vomit (187)</li> <li>• Ocular abnormalities (187)</li> <li>• Dental problems (194)</li> <li>• Scoliosis (18,187)</li> <li>• Heart failure (195)</li> <li>• Genital abnormalities (187)</li> <li>• Psychiatric problems, such as psychotic illness (196)</li> <li>• Autistic features (187)</li> <li>• Hypotonia (187)</li> </ul> |
| Rett syndrome                | <ul style="list-style-type: none"> <li>• Osteopenia (197)</li> </ul>                                                                                                                                                                                                                                                                                                                | <ul style="list-style-type: none"> <li>• Gastroesophageal reflux (197)</li> <li>• Constipation (198)</li> <li>• Gallbladder disease (199)</li> <li>• Hyperventilation (200)</li> <li>• Cardiovascular autonomic dysregulation (200)</li> </ul>   | <ul style="list-style-type: none"> <li>• Intellectual disability (197)</li> <li>• Disturbed motor control (197)</li> <li>• Seizures (199)</li> <li>• Parkinsonian features (199)</li> <li>• Dystonia (197)</li> <li>• Hypotonia (198)</li> <li>• Sleep disturbances (198)</li> <li>• Behavioral problems (199)</li> <li>• Autistic features (198)</li> <li>• Psychosocial problems (199)</li> <li>• Scoliosis (201)</li> <li>• Difficulty to swallow (199)</li> </ul>                                                                                                     |
| Ring chromosome 21           | <ul style="list-style-type: none"> <li>• Short stature (202)</li> </ul>                                                                                                                                                                                                                                                                                                             | <ul style="list-style-type: none"> <li>• Thrombocytopenia (203)</li> <li>• Association with myelodysplasia, leukemia and lymphomas (203)</li> <li>• Immunodeficiency (203)</li> </ul>                                                            | <ul style="list-style-type: none"> <li>• Intellectual disability (203)</li> <li>• Motor delay (203)</li> <li>• Hypertonia (203)</li> <li>• Seizures (203)</li> <li>• Microcephaly (203)</li> </ul>                                                                                                                                                                                                                                                                                                                                                                        |

- 
- Cardiomyopathy (202)
- 

|                                                              |                                                                                                                                                                                    |                                                                                                                                                                                                                     |                                                                                                                                                                                                                                                                                                                                                         |
|--------------------------------------------------------------|------------------------------------------------------------------------------------------------------------------------------------------------------------------------------------|---------------------------------------------------------------------------------------------------------------------------------------------------------------------------------------------------------------------|---------------------------------------------------------------------------------------------------------------------------------------------------------------------------------------------------------------------------------------------------------------------------------------------------------------------------------------------------------|
| Saethre-Chotzen syndrome                                     | <ul style="list-style-type: none"> <li>• Short stature (204)</li> </ul>                                                                                                            | <ul style="list-style-type: none"> <li>• Renal abnormalities (205)</li> <li>• Congenital heart defects (204)</li> <li>• Obstructive sleep apnea (204)</li> </ul>                                                    | <ul style="list-style-type: none"> <li>• Intellectual disability (205)</li> <li>• Hearing loss (206)</li> <li>• Intracranial hypertension (206)</li> <li>• Various skeletal findings (204)</li> <li>• Cleft palate (204)</li> <li>• Strabismus (205)</li> </ul>                                                                                         |
| Say-Barber-Biesecker-Young-Simpson syndrome (KAT6B mutation) | <ul style="list-style-type: none"> <li>• Thyroid abnormalities/thyroid dysfunction (207,208)</li> </ul>                                                                            | <ul style="list-style-type: none"> <li>• Congenital heart disease (209)</li> </ul>                                                                                                                                  | <ul style="list-style-type: none"> <li>• Intellectual disability (209)</li> <li>• Hypoplastic teeth (209)</li> <li>• Hearing impairment (209)</li> <li>• Cleft palate (209)</li> <li>• Genital and patellar abnormalities (207)</li> <li>• Feeding difficulties (207)</li> <li>• Dental abnormalities (207)</li> <li>• Visual problems (208)</li> </ul> |
| Sifrim-Hitz-Weiss syndrome                                   | <ul style="list-style-type: none"> <li>• Hypogonadism (210)</li> <li>• Growth hormone deficiency (211)</li> </ul>                                                                  | <ul style="list-style-type: none"> <li>• Chronic renal insufficiency (210)</li> <li>• Heart defects (210)</li> </ul>                                                                                                | <ul style="list-style-type: none"> <li>• Developmental delay (210)</li> <li>• Intellectual disability (210)</li> <li>• Macrocephaly (210)</li> <li>• Hypotonia (211)</li> <li>• Brain abnormalities (210)</li> <li>• Hearing loss (210)</li> <li>• Ocular abnormalities (210)</li> <li>• Skeletal and limb abnormalities (210)</li> </ul>               |
| Silver-Russell syndrome                                      | <ul style="list-style-type: none"> <li>• Growth hormone deficiency (104)</li> <li>• Hypoglycemia (104)</li> <li>• Delayed bone age (212)</li> <li>• Short stature (212)</li> </ul> | <ul style="list-style-type: none"> <li>• Gastroesophageal reflux (212)</li> <li>• Constipation (213)</li> <li>• Vomiting (213)</li> <li>• Cardiac defects (104)</li> <li>• Wilms' and other tumors (104)</li> </ul> | <ul style="list-style-type: none"> <li>• Hypotonia (214)</li> <li>• Joint problems (215)</li> <li>• Scoliosis (214)</li> <li>• Urogenital abnormalities (216)</li> <li>• Inguinal hernia (217)</li> <li>• Excess sweating (212)</li> <li>• Developmental delay (212)</li> </ul>                                                                         |

---

|                              |                                                                                                                                                     |                                                                                                                                                                                                                                                                                                                                  |                                                                                                                                                                                                                                                                                                                                                                                                                                               |
|------------------------------|-----------------------------------------------------------------------------------------------------------------------------------------------------|----------------------------------------------------------------------------------------------------------------------------------------------------------------------------------------------------------------------------------------------------------------------------------------------------------------------------------|-----------------------------------------------------------------------------------------------------------------------------------------------------------------------------------------------------------------------------------------------------------------------------------------------------------------------------------------------------------------------------------------------------------------------------------------------|
| Smith-Lemli-Opitz syndrome   | <ul style="list-style-type: none"> <li>• Adrenal insufficiency (218)</li> <li>• Hypo-aldosteronism (219)</li> <li>• Hypothyroidism (218)</li> </ul> | <ul style="list-style-type: none"> <li>• Gastroesophageal reflux (220)</li> <li>• Constipation (218)</li> <li>• Gastro-intestinal motility problems (218)</li> <li>• Hypcholesterolemia (221)</li> <li>• Immune deficiency (218)</li> <li>• Electrolyte abnormalities (218)</li> <li>• Congenital heart defects (218)</li> </ul> | <ul style="list-style-type: none"> <li>• Intellectual disability (218)</li> <li>• Psychiatric problems (222)</li> <li>• Sleep disturbance (222)</li> <li>• Ocular abnormalities (218)</li> <li>• Hearing loss (220)</li> <li>• Congenital dislocation of the hip (223)</li> <li>• Short limbs (218)</li> <li>• Genital abnormalities (218)</li> <li>• Cleft palate (218)</li> <li>• Skeletal problems (218)</li> </ul>                        |
| Smith-Magenis syndrome       | <ul style="list-style-type: none"> <li>• Obesity (224)</li> <li>• Short stature (104)</li> </ul>                                                    | <ul style="list-style-type: none"> <li>• Renal abnormalities (224)</li> <li>• Congenital cardiac defects (104)</li> </ul>                                                                                                                                                                                                        | <ul style="list-style-type: none"> <li>• Intellectual disability (224)</li> <li>• Developmental delay (224)</li> <li>• Seizures (224)</li> <li>• Hearing loss (224)</li> <li>• Ocular abnormalities (224)</li> <li>• Cleft palate (224)</li> <li>• Sleep disturbances (224)</li> <li>• Challenging behavior and self-injurious behaviors (224)</li> <li>• Skeletal abnormalities (104)</li> <li>• Decreased pain sensitivity (104)</li> </ul> |
| Sotos-like syndrome          | <ul style="list-style-type: none"> <li>• Overgrowth (225)</li> <li>• Advanced bone age (226)</li> </ul>                                             | <ul style="list-style-type: none"> <li>• Gastroesophageal reflux (226)</li> <li>• Cardiac abnormalities (226)</li> <li>• Increased risk of tumors (226)</li> <li>• Renal abnormalities (227)</li> </ul>                                                                                                                          | <ul style="list-style-type: none"> <li>• Intellectual disability (225)</li> <li>• Delayed motor development (226)</li> <li>• Hypotonia (228)</li> <li>• Feeding difficulties (226)</li> <li>• Macrocephaly (226)</li> <li>• Scoliosis (226)</li> <li>• Genitourinary abnormalities (226)</li> <li>• Seizures (226)</li> </ul>                                                                                                                 |
| Tatton-Brown-Rahman syndrome | <ul style="list-style-type: none"> <li>• Overgrowth (229)</li> <li>• Obesity (230)</li> </ul>                                                       | <ul style="list-style-type: none"> <li>• Autonomic dysfunction, including central sleep apnea and orthostatic hypotension (229)</li> <li>• Cardiac defects (229)</li> </ul>                                                                                                                                                      | <ul style="list-style-type: none"> <li>• Intellectual disability (229)</li> <li>• Hypotonia (229)</li> <li>• Brain abnormalities (229)</li> <li>• Skeletal abnormalities (229)</li> <li>• Joint hypermobility (229)</li> </ul>                                                                                                                                                                                                                |

|                            |                                                                                                                                                                                                |                                                                                                                                                                                                                                        |                                                                                                                                                                                                                                                                                             |
|----------------------------|------------------------------------------------------------------------------------------------------------------------------------------------------------------------------------------------|----------------------------------------------------------------------------------------------------------------------------------------------------------------------------------------------------------------------------------------|---------------------------------------------------------------------------------------------------------------------------------------------------------------------------------------------------------------------------------------------------------------------------------------------|
|                            |                                                                                                                                                                                                | <ul style="list-style-type: none"> <li>• Gastrointestinal problems (229)</li> <li>• Possibly increased risk of tumors (229)</li> </ul>                                                                                                 | <ul style="list-style-type: none"> <li>• Behavioral/psychiatric problems, including autistic spectrum disorder and ADHD (229,230)</li> <li>• Seizures (230)</li> </ul>                                                                                                                      |
| TBL1X mutation             | <ul style="list-style-type: none"> <li>• Central hypothyroidism (231)</li> <li>• Obesity (231)</li> </ul>                                                                                      | <ul style="list-style-type: none"> <li>• Constipation (232)</li> </ul>                                                                                                                                                                 | <ul style="list-style-type: none"> <li>• Autistic spectrum disorder (233)</li> <li>• Hearing loss (231)</li> <li>• ADHD (232)</li> <li>• Chiari malformation type I (232)</li> </ul>                                                                                                        |
| Tetra X syndrome (48,XXXX) | <ul style="list-style-type: none"> <li>• Premature ovarian failure (234)</li> <li>• Pituitary hormone deficiencies due to a Rathke's cleft cyst (235)</li> <li>• Osteoporosis (234)</li> </ul> | <ul style="list-style-type: none"> <li>• Hemolytic anemia (236)</li> <li>• Thrombocytopenia (236)</li> <li>• Systemic lupus erythematosus (236,237)</li> </ul>                                                                         | <ul style="list-style-type: none"> <li>• Intellectual disability (234,238)</li> <li>• Sleep disturbances (hypersomnia) (239)</li> <li>• Alopecia (236)</li> <li>• Skeletal abnormalities (238)</li> </ul>                                                                                   |
| Triple X syndrome (47,XXX) | <ul style="list-style-type: none"> <li>• Premature ovarian failure (240)</li> <li>• Tall stature (240)</li> </ul>                                                                              | <ul style="list-style-type: none"> <li>• Abdominal pain (241)</li> <li>• Renal abnormalities (240)</li> </ul>                                                                                                                          | <ul style="list-style-type: none"> <li>• Hypotonia (240)</li> <li>• Seizures (240)</li> <li>• Genitourinary abnormalities (240)</li> <li>• Cognitive defects and learning disabilities (240)</li> <li>• Various psychological problems (attention deficit; mood disorders) (240)</li> </ul> |
| TRPV4 mutation             | <ul style="list-style-type: none"> <li>• Osteoporosis (242)</li> <li>• Short stature (242)</li> </ul>                                                                                          | <ul style="list-style-type: none"> <li>• Respiratory dysfunction (242)</li> </ul>                                                                                                                                                      | <ul style="list-style-type: none"> <li>• Neuromuscular problems (242)</li> <li>• Skeletal dysplasias (242)</li> <li>• Sensorineural hearing loss (242)</li> </ul>                                                                                                                           |
| Tuberous sclerosis complex | <ul style="list-style-type: none"> <li>• Increased risk of neuroendocrine tumors (rare) (243)</li> </ul>                                                                                       | <ul style="list-style-type: none"> <li>• Renal abnormalities (243)</li> <li>• Pulmonary problems (243)</li> <li>• Increased risk of tumors (243)</li> <li>• Cardiac lipoma (244)</li> <li>• Gastrointestinal problems (243)</li> </ul> | <ul style="list-style-type: none"> <li>• Epilepsy/seizures (243)</li> <li>• Intellectual disability (243)</li> <li>• TAND (243)</li> <li>• Retinal hamartomas (243)</li> <li>• Dermatological problems (243)</li> </ul>                                                                     |



|                                     |                                                                                                                                                                                                                                                                                                                                                                                                         |                                                                                                                                                                                                                                                                                                                                                                           |                                                                                                                                                                                                                                                                                                                                                                                                                                                                                                                                   |
|-------------------------------------|---------------------------------------------------------------------------------------------------------------------------------------------------------------------------------------------------------------------------------------------------------------------------------------------------------------------------------------------------------------------------------------------------------|---------------------------------------------------------------------------------------------------------------------------------------------------------------------------------------------------------------------------------------------------------------------------------------------------------------------------------------------------------------------------|-----------------------------------------------------------------------------------------------------------------------------------------------------------------------------------------------------------------------------------------------------------------------------------------------------------------------------------------------------------------------------------------------------------------------------------------------------------------------------------------------------------------------------------|
| Turner syndrome                     | <ul style="list-style-type: none"> <li>• Hypothyroidism (245)</li> <li>• Hyperthyroidism (245)</li> <li>• Hypogonadism (245)</li> <li>• Obesity (245)</li> <li>• Osteopenia or osteoporosis (245)</li> <li>• Glucose intolerance (245)</li> <li>• Diabetes mellitus type II (245)</li> <li>• Infertility/subfertility (245)</li> <li>• Delayed bone age (245)</li> <li>• Short stature (245)</li> </ul> | <ul style="list-style-type: none"> <li>• Hypercholesterolemia (245)</li> <li>• Hypertension (246)</li> <li>• Celiac disease (245)</li> <li>• Elevated hepatic enzymes (245)</li> <li>• Increased risk of autoimmune disease (245)</li> <li>• Inflammatory bowel disease (245)</li> <li>• (Congenital) heart defects (245)</li> <li>• Renal abnormalities (245)</li> </ul> | <ul style="list-style-type: none"> <li>• Psychological problems (anxiety, depression)(245)</li> <li>• Visual problems(245)</li> <li>• Hearing problems(245)</li> <li>• Developmental problems (motoric, cognitive and psychosocial) (245)</li> <li>• Dermatological problems (245)</li> <li>• Dental problems (245)</li> <li>• Lymphedema of hands and feet (245)</li> <li>• Scoliosis (245)</li> </ul>                                                                                                                           |
| Williams-Beuren syndrome            | <ul style="list-style-type: none"> <li>• Osteopenia/osteoporosis (247)</li> <li>• Hypercalcemia (247)</li> <li>• Hypothyroidism (247)</li> <li>• Obesity (248)</li> <li>• Growth hormone deficiency (249)</li> <li>• Diabetes mellitus (247)</li> <li>• Early onset of puberty (247)</li> <li>• Short stature (247)</li> </ul>                                                                          | <ul style="list-style-type: none"> <li>• Hypertension (247)</li> <li>• Gastroesophageal reflux (247)</li> <li>• Constipation (247)</li> <li>• Celiac disease (247)</li> <li>• Recurrent otitis media (247)</li> <li>• Cardiovascular disease (247)</li> <li>• Abdominal pain (247)</li> <li>• Diverticular disease (247)</li> </ul>                                       | <ul style="list-style-type: none"> <li>• Intellectual disability (247)</li> <li>• Epilepsy (250)</li> <li>• Sleep dysregulation (247)</li> <li>• ADHD (247)</li> <li>• Ocular abnormalities (247)</li> <li>• Hearing loss (247)</li> <li>• Hypotonia (247)</li> <li>• Scoliosis or lordosis (247)</li> <li>• Joint laxity (247)</li> <li>• Genitourinary problems (247)</li> <li>• Hyperacusis (247)</li> <li>• Increased risk of stroke (247)</li> <li>• Dental problems (247)</li> <li>• Neurological problems (247)</li> </ul> |
| 45,X/46,XY mixed gonadal dysgenesis | <ul style="list-style-type: none"> <li>• Autoimmune thyroid disease (251)</li> <li>• Delayed puberty (251)</li> <li>• Short stature (251)</li> </ul>                                                                                                                                                                                                                                                    | <ul style="list-style-type: none"> <li>• Renal malformations (251)</li> </ul>                                                                                                                                                                                                                                                                                             | <ul style="list-style-type: none"> <li>• Atypical genitalia (251)</li> <li>• Intellectual disability (252)</li> </ul>                                                                                                                                                                                                                                                                                                                                                                                                             |
| 48,XXXY syndrome                    | <ul style="list-style-type: none"> <li>• Hypogonadism (253)</li> <li>• Hypothyroidism (253)</li> <li>• Diabetes mellitus type II (253)</li> <li>• Osteoporosis (253)</li> <li>• Tall stature (253)</li> </ul>                                                                                                                                                                                           | <ul style="list-style-type: none"> <li>• Asthma (253)</li> <li>• Allergies (253)</li> <li>• Cardiac abnormalities (253)</li> <li>• Deep vein thrombosis (253)</li> <li>• Constipation (253)</li> <li>• Obstructive sleep apnea (253)</li> </ul>                                                                                                                           | <ul style="list-style-type: none"> <li>• Intellectual disability (253)</li> <li>• Speech and motor delays (253)</li> <li>• Small testicular size (253)</li> <li>• Tremor (253)</li> <li>• Scoliosis (253)</li> <li>• Seizures (253)</li> </ul>                                                                                                                                                                                                                                                                                    |

|                  |                                                                                                                                                                                                               |                                                                                                                                                                                                                                                                                                                           |                                                                                                                                                                                                                                                                                                                                                                                                                                                   |
|------------------|---------------------------------------------------------------------------------------------------------------------------------------------------------------------------------------------------------------|---------------------------------------------------------------------------------------------------------------------------------------------------------------------------------------------------------------------------------------------------------------------------------------------------------------------------|---------------------------------------------------------------------------------------------------------------------------------------------------------------------------------------------------------------------------------------------------------------------------------------------------------------------------------------------------------------------------------------------------------------------------------------------------|
| 48,XXYY syndrome | <ul style="list-style-type: none"> <li>• Hypogonadism (254)</li> <li>• Diabetes mellitus type II (255)</li> <li>• Hypothyroidism (255)</li> <li>• Osteoporosis (253)</li> <li>• Tall stature (255)</li> </ul> | <ul style="list-style-type: none"> <li>• Allergies (255)</li> <li>• Asthma (255)</li> <li>• Constipation (255)</li> <li>• Gastroesophageal reflux (255)</li> <li>• Cardiac abnormalities (255)</li> <li>• Deep vein thrombosis (255)</li> <li>• Renal dysplasia (253)</li> <li>• Obstructive sleep apnea (253)</li> </ul> | <ul style="list-style-type: none"> <li>• Intellectual disability (253)</li> <li>• Speech and motor delays (253)</li> <li>• Autism spectrum disorder or deficits in social communication or interaction skills (256)</li> <li>• Psychological problems (255)</li> <li>• Scoliosis (255)</li> <li>• Seizures (255)</li> <li>• Tremors (254)</li> <li>• Cryptorchidism (255)</li> <li>• Brain abnormalities (255)</li> <li>• Tremor (253)</li> </ul> |
|------------------|---------------------------------------------------------------------------------------------------------------------------------------------------------------------------------------------------------------|---------------------------------------------------------------------------------------------------------------------------------------------------------------------------------------------------------------------------------------------------------------------------------------------------------------------------|---------------------------------------------------------------------------------------------------------------------------------------------------------------------------------------------------------------------------------------------------------------------------------------------------------------------------------------------------------------------------------------------------------------------------------------------------|

Abbreviations: ACTH, adrenocorticotrophic hormone; ADHD, attention deficit hyperactivity disorder; TAND, TSC-associated neuropsychiatric disorders, e.g. autism, anxiety, depression, aggressive behavior, sleep disorders

In reality, some manifestations might have a similar prevalence as in the general population, because of publication bias. Although the literature was thoroughly searched, the overview might be incomplete.

<sup>a</sup> There are many different types of Disorders of Sex Development. Therefore, we advise to check the specific type of disorder in the literature for the specific clinical manifestations. <sup>b</sup> These manifestations are mostly associated with optic pathway gliomas in patients with Neurofibromatosis type 1.
